# Supplementary material for: A comparative analysis of methods for de novo assembly of hymenopteran genomes using either haploid or diploid samples
Source: PubMed Central journal article supplement (PMC6482151; doi:10.1038/s41598-019-42795-6), 2019-04-24
Supplement: 41598_2019_42795_MOESM1_ESM.pdf [file 41598_2019_42795_MOESM1_ESM.pdf]

1 **Supplementary material:**

2

3 **A comparative analysis of methods for *de novo* assembly of**  
4 **hymenopteran genomes using either haploid or diploid samples**

5 **Tal Yahav, Eyal Privman<sup>#</sup>**

6

7 Department of Evolutionary and Environmental Biology, Institute of Evolution, University of Haifa, Haifa 3498838, Israel

8

9 <sup>#</sup> Corresponding author: Eyal Privman [eprivman@univ.haifa.ac.il](mailto:eprivman@univ.haifa.ac.il)

10

11

12

13

14

15 **Content:**

16 Supplementary figure S1

17 Supplementary tables S2 – S6

18 Supplementary files S7 – S8

19 Supplementary references

20

21

22

23

24

25

26

27

28

29

30

31

32

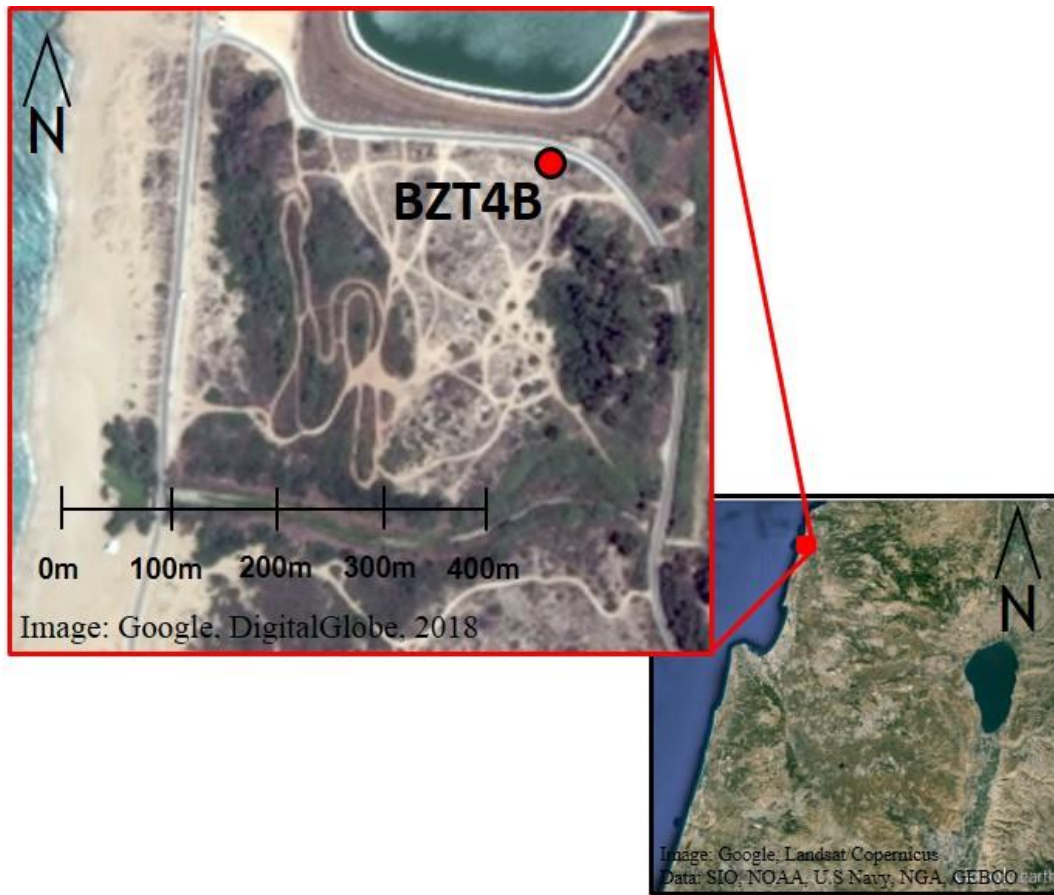

33

34 **Figure S1:** a satellite image of the research area in *Bezet* beach ( $33^{\circ}4'40.88''\text{N}$  /  $35^{\circ}6'33.97''\text{E}$ ;  
35 Google earth). Red dot marks nest BZT4B, from which the male and worker sample for the  
36 reference genome were taken.

37

38

39

40

41

42

43

44

45

46 **Table S2:** RNA pool composition with quantity and purity measurements using ND200. Total  
 47 volume of pool sample for sequencing was 60µl. only four samples were diluted (Larva\_1, Larva\_2,  
 48 Larva\_4, Larve\_5). 260/280 ratio < 2 indicate protein residue contamination. 260/230 ratio < 2.2  
 49 indicates chemical contamination.

| Sample type             | Nucleic Acid concentration [ng/µl] | 260/280 ratio | 260/230 ratio | Total amount of RNA in sample [ng/50µl] | concentration After x10 dilution [ng/µl] | volume taken after dilution [µl] |
|-------------------------|------------------------------------|---------------|---------------|-----------------------------------------|------------------------------------------|----------------------------------|
| Larva_1 (small size)    | 1052.3                             | 2.13          | 2.24          | 52615                                   | 105.23                                   | 5                                |
| Larva_2 (small size)    | 1790                               | 2.13          | 2.09          | 89500                                   | 179                                      | 3                                |
| Larva_3 (medium size)   | 661.6                              | 2.08          | 2.01          | 33080                                   | N/A                                      | 1                                |
| Larva_4 (medium size)   | 1243.2                             | 2.11          | 1.77          | 62160                                   | 124.32                                   | 5                                |
| Larva_5 (large size)    | 1356.3                             | 2.12          | 1.97          | 67815                                   | 135.63                                   | 5                                |
| Pupa_1 (small size)     | 83.8                               | 2.08          | 0.92          | 4190                                    | N/A                                      | 7                                |
| Pupa_2 (small size)     | 102.7                              | 2.11          | 0.94          | 5135                                    | N/A                                      | 5                                |
| Pupa_3 (large size)     | 215.1                              | 2.11          | 1.15          | 10755                                   | N/A                                      | 5                                |
| Gyne                    | 57.2                               | 2.06          | 0.89          | 2860                                    | N/A                                      | 20                               |
| Male                    | 146.5                              | 2.2           | 1.85          | 7325                                    | N/A                                      | 10                               |
| Worker                  | 105.7                              | 2.02          | 1.1           | 5285                                    | N/A                                      | 10                               |
| Total RNA_POOL-A sample | 106.6                              | 2.03          | 1.08          |                                         |                                          | 60                               |
| Total RNA_POOL-B sample | 102                                | 2.01          | 1.11          |                                         |                                          | 60                               |

50

51

52 **Table S3:** DNA and RNA ND2000 measurements results for the male candidate samples and  
 53 Worker DNA measurements.

| Sample type  | Nucleic Acid concentration [ng/µl] | 260/280 ratio | 260/230 ratio | Total amount of DNA/RNA in sample [ng/40µl] |
|--------------|------------------------------------|---------------|---------------|---------------------------------------------|
| DNA          |                                    |               |               |                                             |
| Male_BZT4B   | 121.824                            | 2.229         | 0.649         | 4872.96                                     |
| Male_BZT4C   | 45.652                             | 2.227         | 0.735         | 1826.08                                     |
| Male_BZT7    | 44.861                             | 2.186         | 0.899         | 1794.44                                     |
| Worker_BZT4B | 278.8                              | 2.12          | 1.9           | 8364                                        |
| RNA          |                                    |               |               |                                             |
| BZT4B_M1     | 660.113                            | 2.274         | 1.512         | 26404.52                                    |
| BZT4C_M2     | 1038.168                           | 2.26          | 2.247         | 41526.72                                    |
| BZT7_M2      | 1065.382                           | 2.277         | 1.518         | 42615.28                                    |

54

55

56

57

58

59 **Table S4:** Species homolog proteins used for MAKER annotation

| Species name                   | Databae                       |
|--------------------------------|-------------------------------|
| <i>Acromyrmex echinator</i>    | http://www.antgenomes.org     |
| <i>Atta cephalotes</i>         | http://www.antgenomes.org     |
| <i>Harpegnathos saltator</i>   | http://www.antgenomes.org     |
| <i>Lasius niger</i>            | http://www.antgenomes.org     |
| <i>Linepithema humile</i>      | http://www.antgenomes.org     |
| <i>Pogonomyrmex barbatus</i>   | http://www.antgenomes.org     |
| <i>Drosophila melanogaster</i> | https://www.ncbi.nlm.nih.gov/ |
| <i>Apis mellifera</i>          | https://www.ncbi.nlm.nih.gov/ |
| <i>Polistes dominula</i>       | https://www.ncbi.nlm.nih.gov/ |

60

61

62 **Table S5:** Microsatellites used for ploidy test of the male samples. *C. niger* (Cn02 and Cn04), *C.*  
63 *hyspanica* (Ch08)<sup>S1</sup> and *C. cursor* (Cc54)<sup>S2</sup>.

| Locus       | Dye | Expected size | Homozygosity* | Primer sequence                                                             |
|-------------|-----|---------------|---------------|-----------------------------------------------------------------------------|
| <b>Cn02</b> | PET | 115 bp        | 0.682         | Forward 5'=>3' GAGGCCCTGAAAAGAAGAT<br>Reverse 5'=>3' TTCTATCTGTGCCGCTTCT    |
| <b>Cn04</b> | VIC | 95 bp         | 0.251         | Forward 5'=>3' GGAAACTCGTGCGAAAATC<br>Reverse 5'=>3' GAGCTCAGTGTGCATTCAACAT |
| <b>Ch08</b> | NED | 135 bp        | 0.289         | Forward 5'=>3' GCTGATAATCGCGTCTGGAT<br>Reverse 5'=>3' CGACGTAAAGAGGAACGTGA  |
| <b>Cc54</b> | FAM | 210 bp        | 0.553         | Forward 5'=>3' GAATTTGAATGGCTGATTGC<br>Reverse 5'=>3' ATGGTCGTTGGCATAAAGG   |

64 \* Proportion of homozygous out of a total of 708 samples in the *Bezet* site.

65

66 **Table S6:** Completeness results by BUSCO against restricted Arthropoda dataset

| Cufflinks                    |                  |       |                  |       |
|------------------------------|------------------|-------|------------------|-------|
|                              | MvW <sup>a</sup> |       | PvW <sup>b</sup> |       |
| <b>Complete</b>              | 117              | 24.6% | 112              | 23.5% |
| <i>Single copy</i>           | 97               | 20.4% | 83               | 17.4% |
| <i>Duplicated</i>            | 20               | 4.2%  | 29               | 6.1%  |
| <b>Fragmented</b>            | 173              | 36.3% | 184              | 38.7% |
| <b>Missing</b>               | 186              | 39.1% | 180              | 37.8% |
| <b>476 total BUSCO genes</b> |                  |       |                  |       |

67 (a) *MvW* refers to male RNA mapped against the worker genome assembly. (b) *PvW* refers to pool RNA mapped against the  
68 worker genome.

69

70

71 **File S7:** All Prep Mini DNA and RNA modified protocol for *Cataglyphis* ants

72 Amount of starting material Volume of Buffer RLT  
73 20–30 mg 600 µl (an average *cataglyphis* worker is ~20 mg)

74

75 **Tissue disruption:**

76

77 1. Disrupt the tissue and homogenize the lysate in RLT.  
78 \*\*\* add 10 µl of β-ME to 1ml of RLT buffer before use.

79

80 Disruption and homogenization using the Tissue Lysser >>> 3 metal beads + shredded glass powder +  
81 glass beads (SIGMA) inside 1.5-2 ml tube. Snap frozen tissue is put inside tube and in liquid nitrogen  
82 before disruption (can be repeated).

83 Tissue Lysser >>> 30 Hz for cycles of 20 sec (or 50 sec) **dry cycles** + **wet cycles** with addition of 100ul of  
84 RLT+ β-ME.

85 After Tissue Lysser add 700 µl of RLT and incubate in 65°C for 30-60 min.

86 2. **Centrifuge** >>> lysate for 3 min, max speed.  
87 Carefully remove the supernatant by pipetting, and transfer it to the AllPrep DNA spin column placed in a  
88 2 ml collection tube.

89

90 **Centrifuge** >>> 30 sec, max speed (can use ~ 10,000 g)

91

92 3. Place the AllPrep DNA spin column in a new 2 ml Eppendorf tube and store at 4°C for later DNA  
93 purification. **Do not freeze the column.**

94

95 \*\*\*Use the flow-through for RNA purification.

96

97 **Total RNA purification:**

98

99 4. Add 1 volume (~700 µl) of 100% frozen ethanol (instead of 70%) to the flow through, and mix well by  
100 pipetting. **Do not centrifuge.** Incubate in -20°C for 10-15min.

101

102 5. Transfer up to 700 µl of the sample, including any precipitate that may have formed, to an RNeasy spin  
103 column placed in a 2 ml Collection tube.

104

105 **Centrifuge** >>> 30 sec, max speed (Discard the flow through).

106

107

108 \*\*\* If the sample volume exceeds 700 µl, centrifuge successive aliquots in the same RNeasy spin column.  
109 Discard the flow-through after each centrifugation.

110

111 **DNase Treatment (optional):**

112

113 E1. Add 350 µl Buffer RW1 to the RNeasy spin column, and centrifuge for 15 s at ≥8000 x g (≥10,000  
114 rpm) to wash the spin column membrane. Discard the flow-through.\*

115

116 Reuse the collection tube in step E4.

117

118 E2. Add 10 µl DNase I stock solution (see above) to 70 µl Buffer RDD.  
119 Mix by gently inverting the tube, and centrifuge briefly to collect  
120 residual liquid from the sides of the tube.

121 Buffer RDD is supplied with the RNase-Free DNase Set.

122 Note: DNase I is especially sensitive to physical denaturation. Mixing  
123 should only be carried out by gently inverting the tube. Do not vortex.

124  
125 E3. Add the DNase I incubation mix (80 µl) directly to the RNeasy spin  
126 column membrane, and incubate at room temperature (20–30°C) for  
127 15 min.

128  
129 **\*Note:** Be sure to add the DNase I incubation mix directly to the RNeasy spin column membrane. DNase  
130 digestion will be incomplete if part of the mix sticks to the walls or the O-ring of the spin column.

131  
132 E4. Add 350 µl Buffer RW1 to the RNeasy spin column, and centrifuge  
133 for 15 s at  $\geq 8000 \times g$  ( $\geq 10,000$  rpm). Discard the flow-through.\*  
134 Continue with step 9 of the protocol on page 26 (i.e., the first wash  
135 with Buffer RPE).

136 Reuse the collection tube in step 9.

137

138 **Optional:**

139 6. Add 700 µl Buffer RW1 to the RNeasy spin column to wash the spin column membrane.

140

141 **Centrifuge** >>> 30 sec, max speed (Discard the flow-through).

142

143 7. Add 450 µl RPE to the RNeasy spin column (can do 2-3 washes)  
144 Reuse the collection tube in step 10.

145

146 8. Add 450 µl RPE to the RNeasy spin column.

147

148 **Centrifuge** >>> 2 min, max speed (Discard the flow-through).

149

150 9. Place the RNeasy spin column in a new 2 ml collection tube (discard the old collection tube with the  
151 flow through).

152

153 **Centrifuge** >>> 1 min, max speed.

154

155 10. Place the RNeasy spin column in a new 1.5-2 ml collection tube Add 40 µl RNase-free water directly to  
156 the spin column membrane. Incubate for 10-15 min in RT.

157

158 **Centrifuge** >>> 1 min, max speed.

159

160

161 **Genomic DNA purification:**

162

163 11. Add 500 µl Buffer AW1 to the AllPrep DNA spin column from step 5.

164

165 **Centrifuge** >>> 30 sec, max speed. (Discard the flow-through).

166

167 Note: Buffer AW1 is supplied as a concentrate. Ensure that ethanol is added to Buffer AW1 before use.

168  
169 12. Add 500 µl Buffer AW2 to the column.  
170 **Centrifuge** >>> 2 min, max speed. (Discard the flow-through).

171 13. Place the AllPrep DNA spin column in a new 1.5 ml collection tube  
172 Add 50 µl Buffer EB (preferably use 2mM tris heated to 55°C) directly to the spin column membrane and  
173 close the lid. Incubate 10-15 min at RT.  
174  
175 **Centrifuge** >>> 1min, max speed.  
176

177

178 **File S8:** List of commands used in the various pipelines in the genome and transcriptome  
179 assembly as well as quality assessment.

180 'java -jar trimmomatic-0.36.jar PE -phred33 ILLUMINACLIP:TruSeq3-PE.fa:2:30:10 LEADING:3 TRAILING:3  
181 SLIDINGWINDOW:4:15 MINLEN:80'

182 'java -jar trimmomatic-0.36.jar PE -phred33 ILLUMINACLIP:TruSeq3-PE.fa:2:30:10 LEADING:3 TRAILING:3  
183 SLIDINGWINDOW:4:15 MINLEN:60'

184 'spades.py --pe1-1 < 300bp R1.fastq > --pe1-2 < 300bp R2.fastq > --pe2-1 < 550bp R1.fastq > --pe2-2 < 550bp  
185 R2.fastq > -k 13,23,33,43,53,63,73,83,93,103,113,123 -t 20 -o <output folder>'

186 'SOAPdenovo-127mer all -s cdru\_W4B.config -K 115 -R -p 20 -o cdru\_W4B 1>cdru\_W4B.log 2>cdru\_W4B.err'

187 'python3 BUSCO\_v1.22.py -o dru\_M4B\_4\_3\_2017\_SOAP -in  
188 /data/home/ASSEMBLIES/SOAPdenovo2/cdru\_M4B\_28\_2\_2017/cdru\_M4B.scafSeq -l  
189 /data/home/SOFTWARES/BUSCO\_v1.22/arthropoda -m genome -c 20'

190 'python quast.py -e -t 20 -o /data/home/ASSEMBLIES/QUAST/cdru\_W4B\_spades\_4\_3\_2017  
191 /data/home/ASSEMBLIES/SPades/W4B\_K13-123\_28\_2\_2017\_B/scaffolds.fasta /data/home  
192 /ASSEMBLIES/SPades/W4B\_K13-123\_28\_2\_2017\_B/contigs.fasta -R /data/home  
193 /ANTS\_RAW\_DATA/ANTS\_ASSEMBLIES/Chis1\_v1.0.sorted.fa'

194 'bowtie2-build --threads 20 -f /data/home/ASSEMBLIES/SPades/W4B\_K13-123\_28\_2\_2017\_B/scaffolds.fasta  
195 cdru\_W4B'

196 'gffread transcripts.gff3 -g /data/home/C\_DRUSUS\_TAL/ASSEMBLIES/DNA/SPades/M4B\_K13-  
197 123\_28\_2\_2017\_B/scaffolds.fasta -y transcripts\_2.fasta -M'

198 'sed -e 1~16d;2~16d;3~16d;4~16d'

199 'tophat -p 20 M4B\_K13-123\_28\_2\_2017\_B\_scaffolds  
200 /data/home/C\_DRUSUS\_TAL/7\_RNA\_M4B\_PE125\_IS500/RAW\_DATA/RNA\_M4B\_Pst\_R1.fastq  
201 /data/home/C\_DRUSUS\_TAL/7\_RNA\_M4B\_PE125\_IS500/RAW\_DATA/RNA\_M4B\_Pst\_R2.fastq'

202 'cufflinks --no-update-check -p 20  
203 /data/home/ASSEMBLIES/RNA/bowtie2\_spades\_12\_8\_2017/M4B\_Vs\_M4B\_asm/tophat\_out/accepted\_hits.bam'

204

205 **Supplementary references**

- 206 S1. Darras, H., Leniaud, L. & Aron, S. Large-scale distribution of hybridogenetic lineages in a Spanish desert ant.  
207 *Proc. R. Soc. B* **281**, 20132396 (2014).
- 208 S2. Percy, M., Clémencet, J., Chameron, S., Aron, S. & Doums, C. Characterization of nuclear DNA  
209 microsatellite markers in the ant *Cataglyphis cursor*. *Mol. Ecol. Notes* **4**, 642–644 (2004).

210

211
